# Supplementary material for: A novel label-free fluorescence strategy for methyltransferase activity assay based on dsDNA-templated copper nanoparticles coupled with an endonuclease-assisted signal transduction system
Source: Royal Society of Chemistry journal article supplement (doi:10.1039/c5an02123e), 2016-01-01
Supplement: c5an02123e1.pdf [file c5an02123e1.pdf]

## Supplementary Materials

### **A Novel Label-Free Fluorescent Strategy for Methyltransferase Activity Assay based on dsDNA-Templated Copper Nanoparticles Coupled with Endonuclease-Assisted Signal Transduction System**

*Q. Q. Lai<sup>a</sup>, M.D. Liu<sup>a</sup>, C. C. Gu<sup>a</sup>, H. G. Nie<sup>a\*</sup>, X. J. Xu<sup>a</sup>, Z. H. Li<sup>b\*</sup>, Z. Yang<sup>a</sup>, and S. M. Huang<sup>a\*</sup>*

*<sup>a</sup>Nanomaterials and Chemistry Key Laboratory, College of Chemistry and Materials Engineering, Wenzhou University, Wenzhou, 325027, P. R. China*

*<sup>b</sup>The Institute of Molecular Medicine, School of Optometry and Ophthalmology and Eye Hospital, Wenzhou Medical University, Wenzhou, Zhejiang, P. R. China.*

\* Corresponding author. Tel: 86-577-88373017; Fax: 86-577-88373017

*E-mail: huaguinie@126.com, smart\_dream2010@yahoo.com.hk, smhuang@wzu.edu.cn*

**Table S1.** Sequences of Oligonucleotides (5'→3') Used in This Work

| Probes   | Sequences              |        |
|----------|------------------------|--------|
| Probe 1  | GTATTCTGATCTCTCTAC     | 18-mer |
| Probe 2  | GTAGAGAGATCAGAATAC     | 18-mer |
| Probe 3  | GTATTCTGA              | 9-mer  |
| Probe 4  | TCTCTCTAC              | 9-mer  |
| Probe 5  | CGTATTCTGATCTCTCTACA   | 20-mer |
| Probe 6  | TGTAGAGAGATCAGAATACG   | 20-mer |
| Probe 7  | ACGTATTCTGATCTCTCTACAC | 22-mer |
| Probe 8  | GTGTAGAGAGATCAGAATACGT | 22-mer |
| Probe 9  | TATTCTGATCTCTCTA       | 16-mer |
| Probe 10 | TAGAGAGATCAGAATA       | 16-mer |
| Probe 11 | ATTCTGATCTCTCT         | 14-mer |
| Probe 12 | AGAGAGATCAGAAT         | 14-mer |

**Fig. S1.** Fluorescence spectra of CuNPs by dsDNA with different numbers of base pairs (bp) as templates. P1/P2 (18 bp); P1 (ssDNA, 18 bp); P2 (ssDNA, 18 bp), P3/P4 (9 bp). The dsDNA-templated fluorescent CuNPs was obtained in the reaction solution containing 100  $\mu\text{M}$   $\text{Cu}^{2+}$ , 2 mM ascorbate, and 1  $\mu\text{M}$  dsDNA for 10 min.

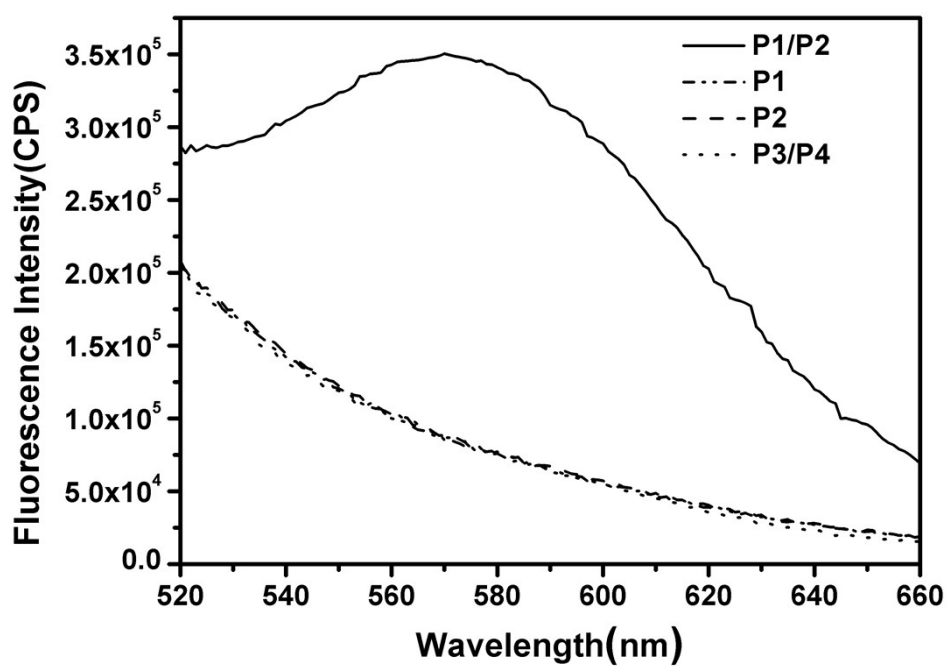

**Fig. S2.** TEM images of the dsDNA-templated fluorescent CuNPs for different lengths dsDNA with (A) 14 bp; (B) 18 bp; (C) 22 bp. Other reaction conditions are as Fig. 2.

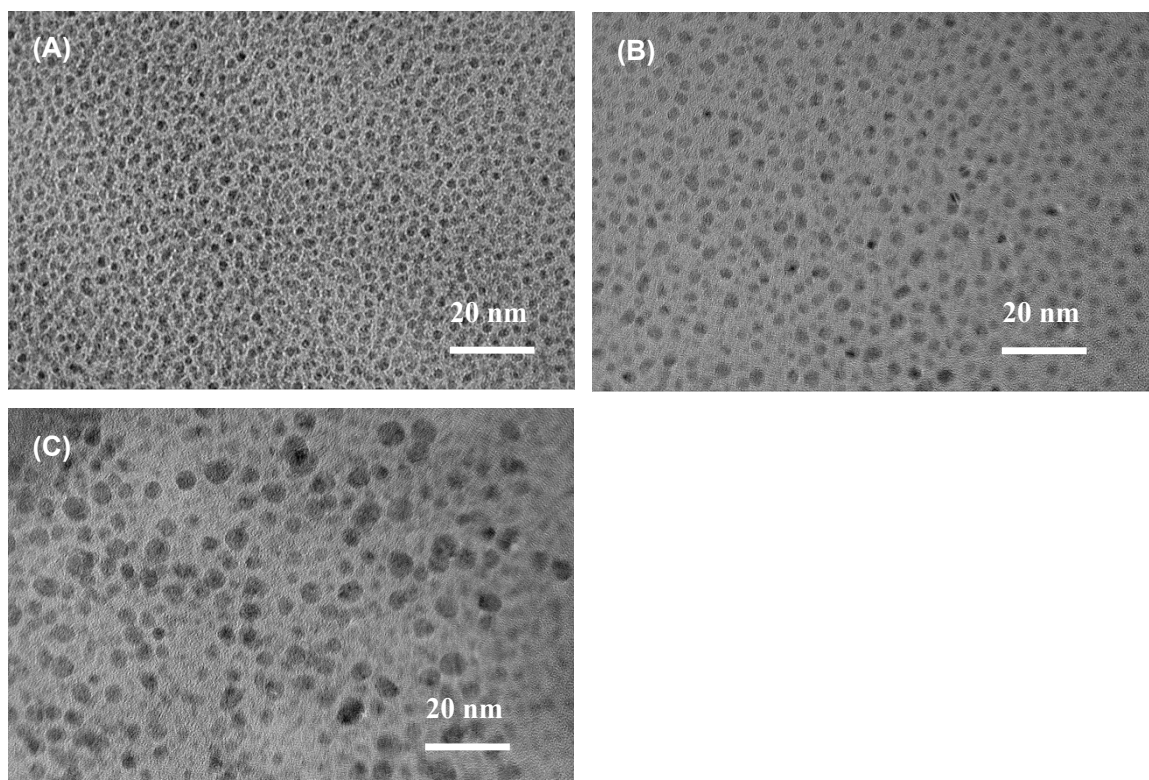

**Fig. S3.** Impact of (A) the concentration of  $\text{Cu}^{2+}$  and (B) the reduction time of  $\text{Cu}^{2+}$  by ascorbate on the fluorescent response of CuNPs; TEM images of dsDNA-templated CuNPs under different concentrations of  $\text{Cu}^{2+}$  with (C) 50  $\mu\text{M}$ , (D) 100  $\mu\text{M}$ , (E) 400  $\mu\text{M}$ . Other reaction conditions are as Fig. 2. Error bars show the standard deviation of five experiments. The average diameter scales of CuNPs under  $\text{Cu}^{2+}$  with 50  $\mu\text{M}$ , 100  $\mu\text{M}$ , and 400  $\mu\text{M}$  are around 2.0 nm, 4.3 nm, 3.2 nm. The corresponding fluorescent quantum yields are 0.5%, 1.2%, 0.8%, respectively.

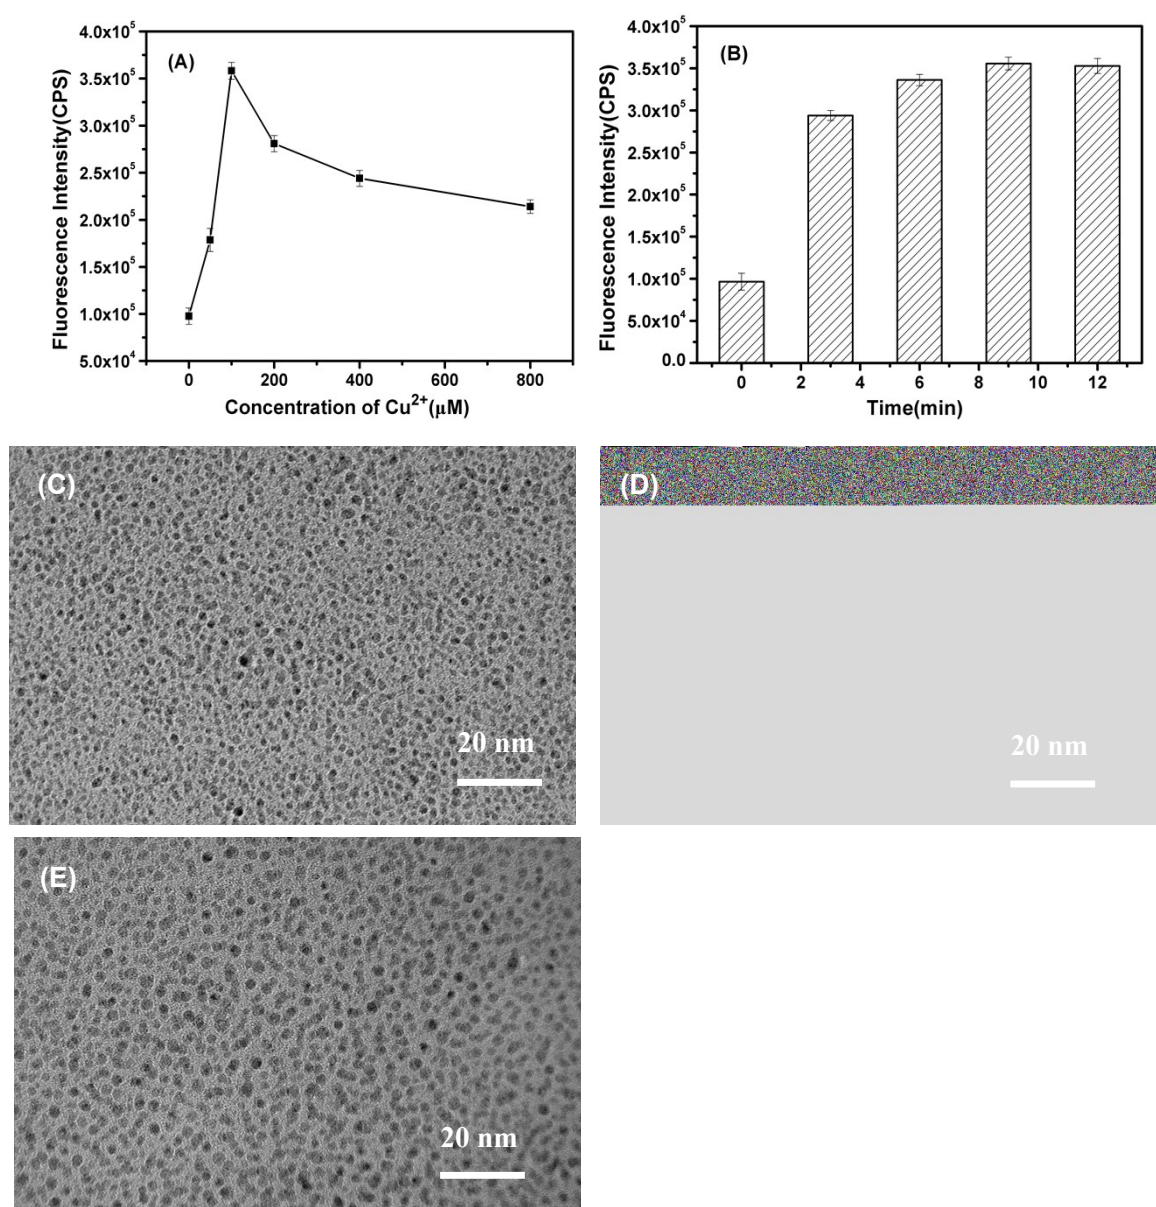

**Fig. S4.** Impact of the enzyme reaction time on the fluorescent response of the dsDNA-templated fluorescent CuNPs. Other reaction conditions are as Fig. 2. Error bars show the standard deviation of five experiments.

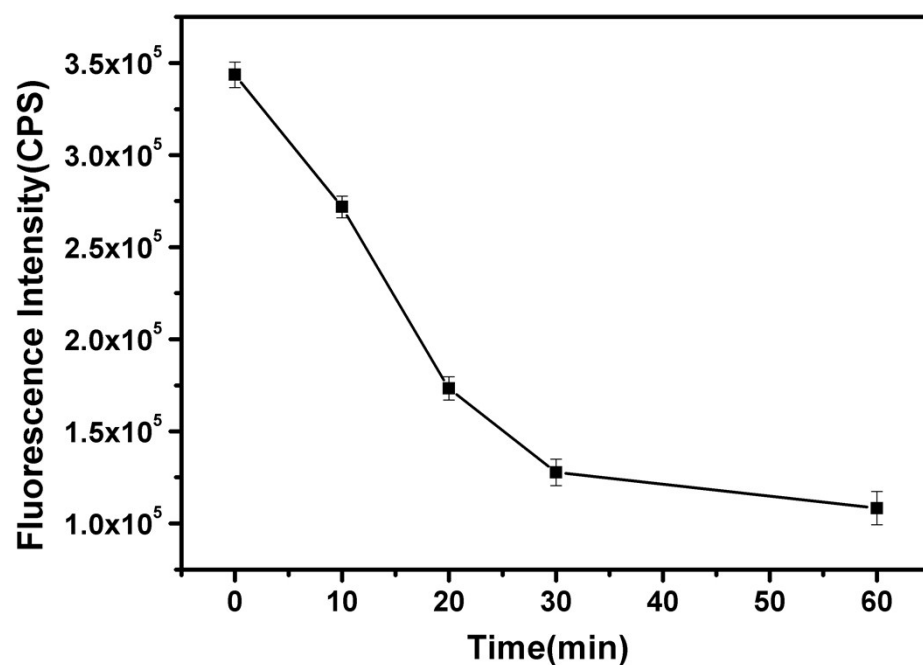

**Fig. S5.** Fluorescent responses for the blank sample, 20 U mL<sup>-1</sup> M.Sss I MTase, 20 U mL<sup>-1</sup> AluI MTase, and 20 U mL<sup>-1</sup> Dam MTase. Other reaction conditions are as Fig. 2. Error bars show the standard deviation of five experiments.

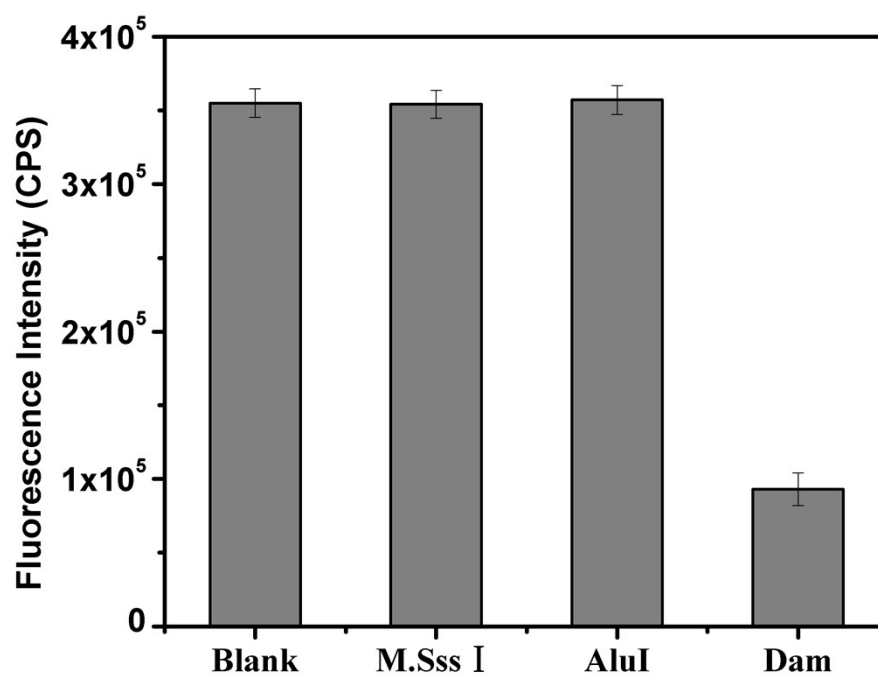

**Fig. S6.** Calibration curve for Dam MTase detection in diluted serum sample. Other reaction conditions are as Fig. 2. Error bars show the standard deviation of five experiments.

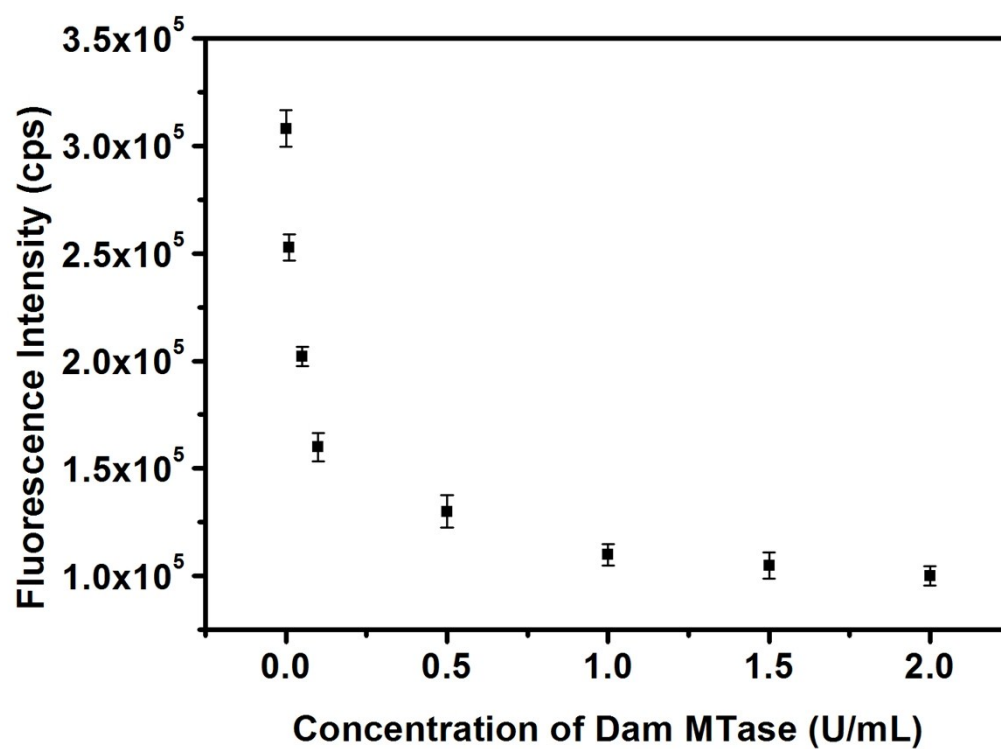

**Fig. S7.** The effect of various concentrations of 5-flurouracil on the relative activity of

DpnI. Other reaction conditions are as Fig. 2. Error bars show the standard deviation of five experiments.

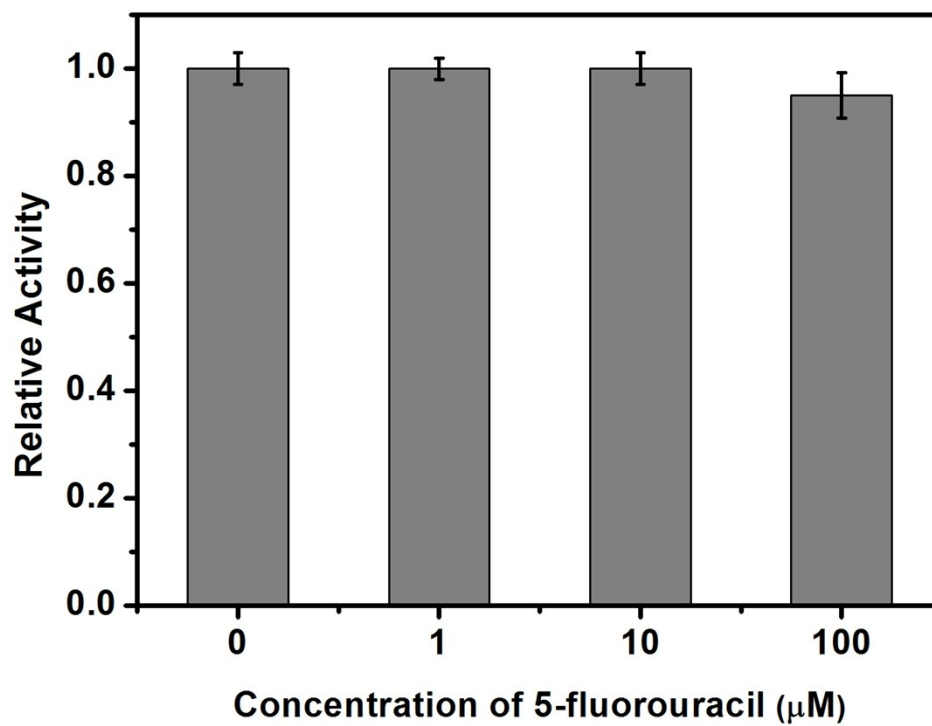

**Fig. S8.** Influence of different drugs on the activity of Dam MTase. (1) No drug, (2)

gentamycin, (3) benzylpenicillin, (4) ampicillin sodium, and (5) 5-fluorouracil. The concentration of all drugs was 0.5  $\mu$ M. Other reaction conditions are as Fig. 2. Error bars show the standard deviation of five experiments.

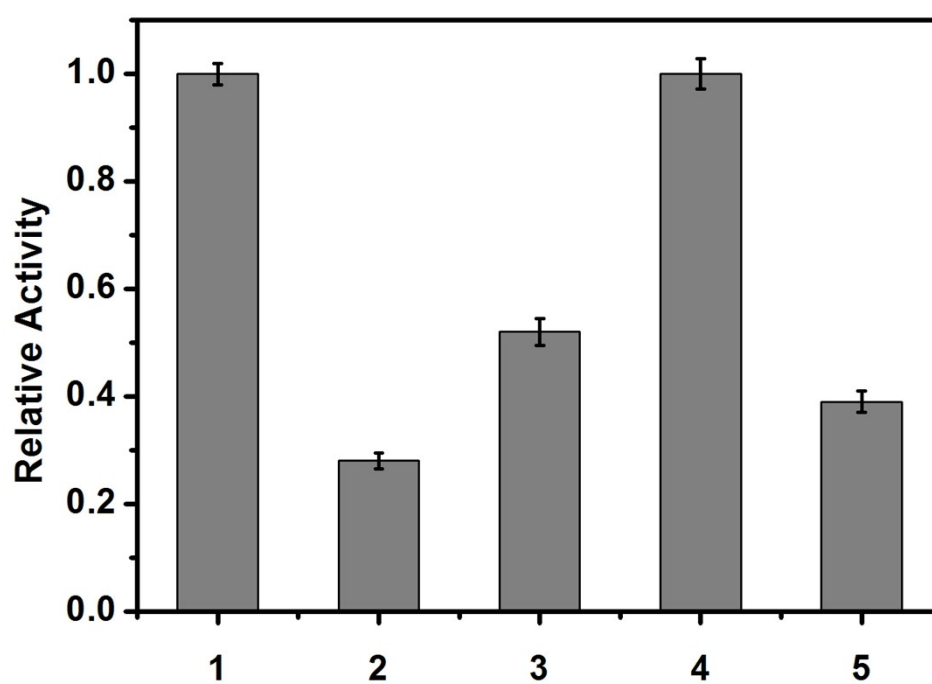

**Table S2.** Comparison of the performances of the developed strategy for MTase activity assay with the reported literatures.

| Detection method                                                                                                                                                                         | Linear range<br>(U/mL) | LOD<br>(U/mL) | Ref               |
|------------------------------------------------------------------------------------------------------------------------------------------------------------------------------------------|------------------------|---------------|-------------------|
| A Novel Label-Free Fluorescent Strategy for Methyltransferase Activity Assay based on dsDNA-Templated Copper Nanoparticles Coupled with Endonuclease Assisted Signal Transduction System | 0.01 to 5              | 0.01          | Present work      |
| DNA-AuNPs based signal amplification for highly sensitive detection of DNA methylation, methyltransferase activity and inhibitor screening                                               | 0.075–30               | 0.02          | Jing et al. 2014  |
| Highly sensitive fluorescence assay of DNA methyltransferase activity via methylation-sensitive cleavage coupled with nicking enzyme-assisted signal amplification                       | —                      | 0.06          | Zhao et al. 2013  |
| A bioluminescence assay for DNA methyltransferase activity based on methylation-resistant cleavage                                                                                       | 0.2–100                | 0.08          | Jiang et al. 2012 |
| Electrochemical strategy for sensing DNA methylation and DNA methyltransferase activity                                                                                                  | 0.25–10                | 0.18          | Wang et al. 2013  |
| An electrochemical one-step system for assaying methyltransferase activity based on transport of a quantum dot signaling tracer                                                          | 1.0–128                | 0.79          | Baek et al. 2013  |

**Table S3.** Recovery experiments of Dam MTase in diluted serum samples

| Samples | Added Dam MTase<br>(U mL <sup>-1</sup> ) | Detected Dam MTase <sup>#</sup><br>(U mL <sup>-1</sup> ) | Recovery (%) |
|---------|------------------------------------------|----------------------------------------------------------|--------------|
| 1       | 0.1                                      | 0.095±0.01                                               | 95.0         |
| 2       | 0.5                                      | 0.49±0.03                                                | 98.0         |
| 3       | 1.0                                      | 1.02±0.06                                                | 102.0        |
| 4       | 1.5                                      | 1.48±0.06                                                | 98.7         |

<sup>#</sup> Average of five experiments ± standard deviation.
